# Supplementary material for: Synthesis of nitrogen-doped activated graphene aerogel/gold nanoparticles and its application for electrochemical detection of hydroquinone and o-dihydroxybenzene
Source: Royal Society of Chemistry journal article supplement (doi:10.1039/c4nr00005f), 2014-01-01
Supplement: c4nr00005f1.pdf [file c4nr00005f1.pdf]

## Support material:

### Synthesis of nitrogen-doped activated graphene aerogel/gold nanoparticles and its application for electrochemical detection of hydroquinone and o-dihydroxybenzene

Zhang Juanjuan,<sup>a</sup> Li Ruiyi,<sup>b</sup> Li Zaijun,<sup>a,c\*</sup> Liu Junkang,<sup>a</sup> Gu Zhiguo<sup>a</sup> and Wang Guangli<sup>a</sup>

<sup>a</sup> School of Chemical and Material Engineering, Jiangnan University, Wuxi 214122, China

<sup>b</sup> The University of Birmingham, Edgbaston, Birmingham, B15 2TT, United Kingdom

<sup>c</sup> The Key Laboratory of Food Colloids and Biotechnology, Ministry of Education, wuxi 214122, China

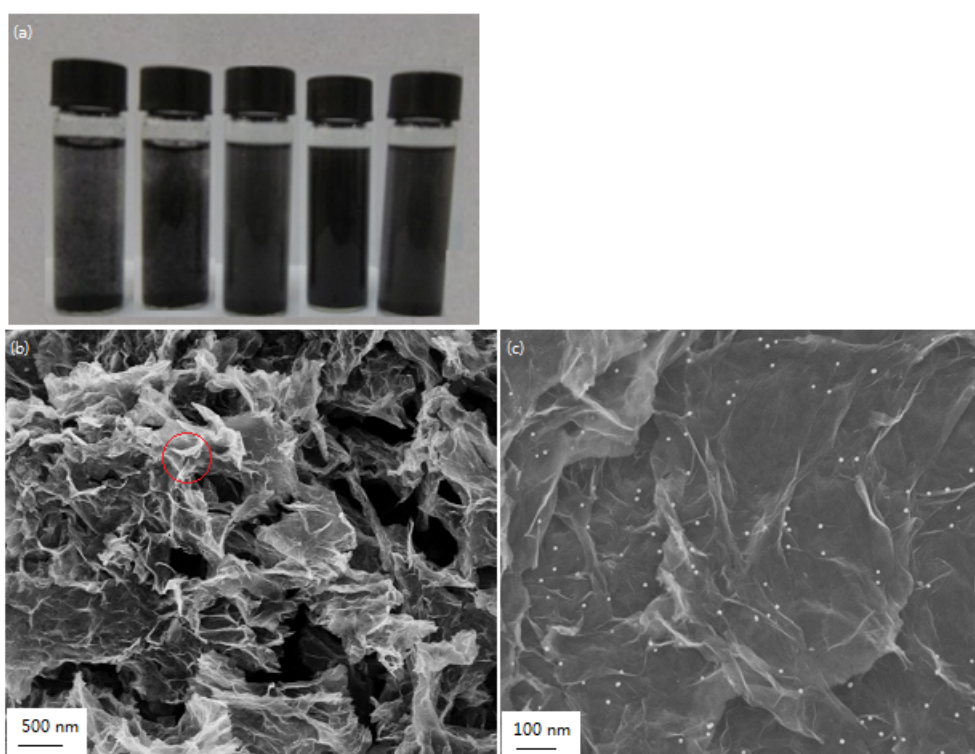

**Fig.S1** Optical photographs (a) of N-doped AGA/GNs dispersed in water, methanol, ethanol ethyl acetate and acetone (from left to right), SEM (b) and enlarged SEM images (c) of N-doped AGA/GNs after dispersion was dried.

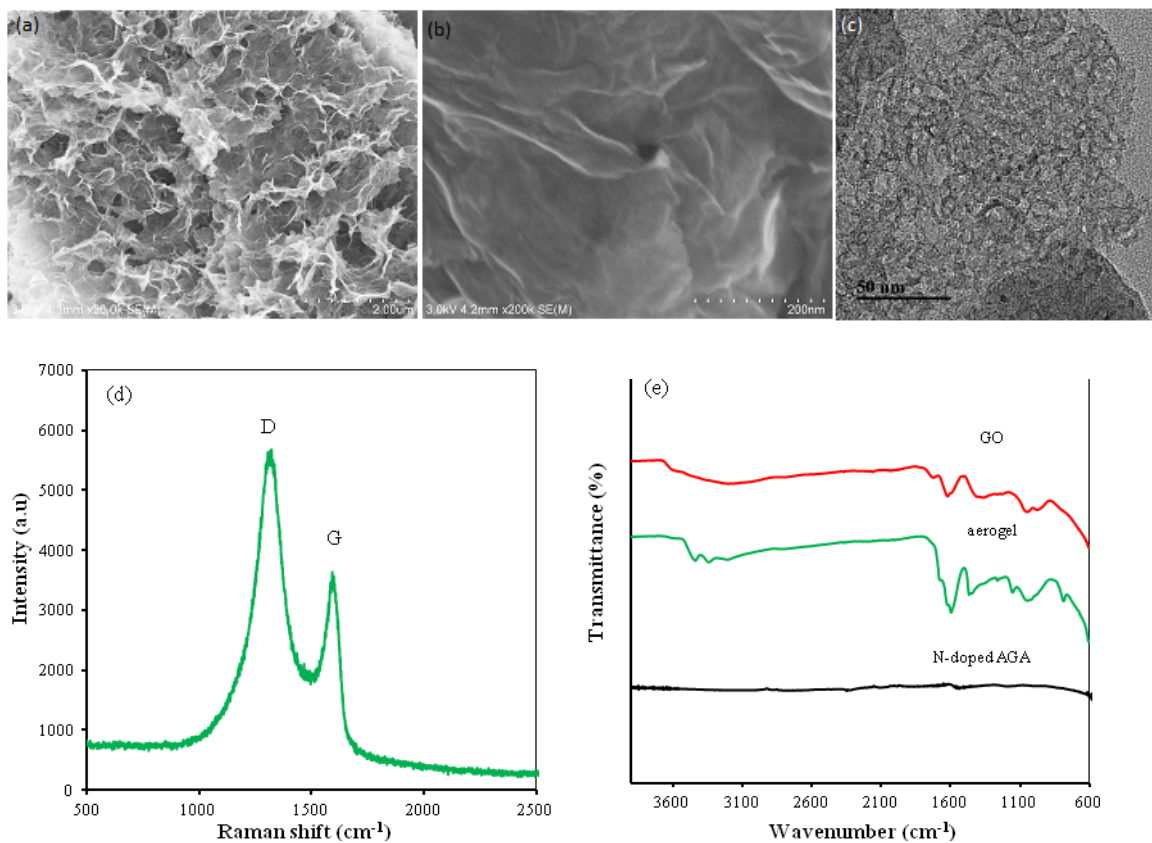

**Fig.s2** The SEM (a), enlarged SEM (b) and TEM images (c), Raman spectrum (d) and IR spectrum (e) of the N-doped AGA

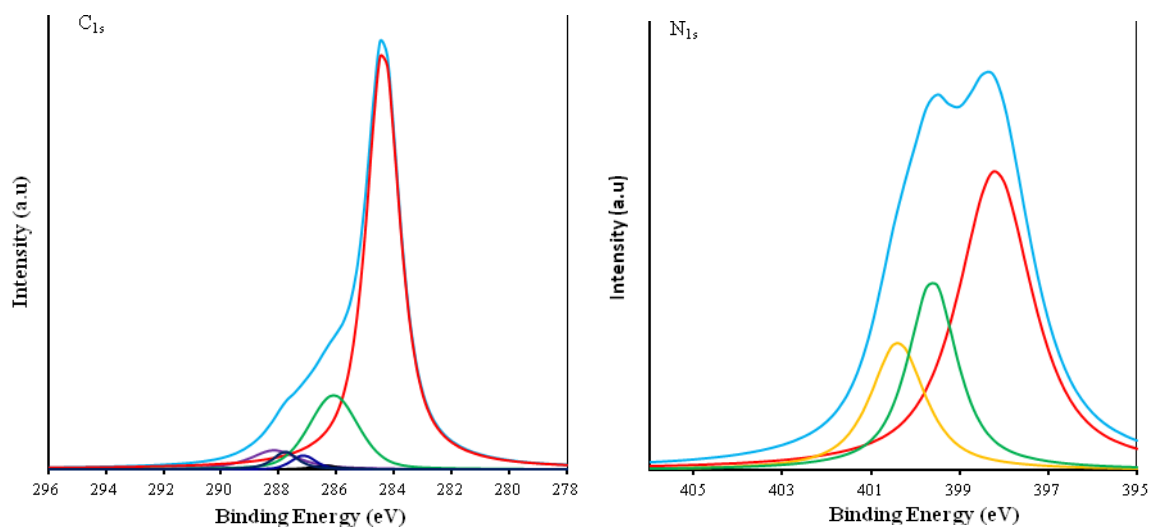

**Fig.s3** Typical C<sub>1s</sub> and N<sub>1s</sub> XPS spectra of the N-doped AGA

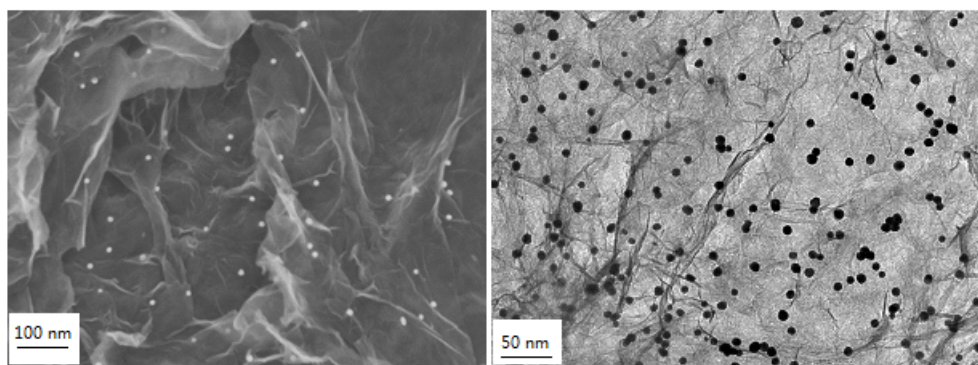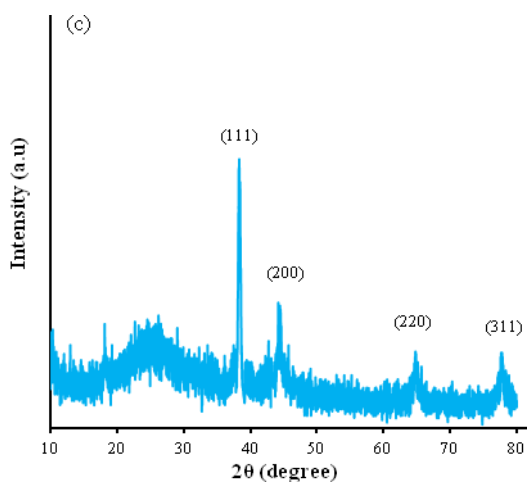

**Fig.s4** Typical SEM (a), TEM (b) and XRD patterns (c) of N-doped AGA/GNs

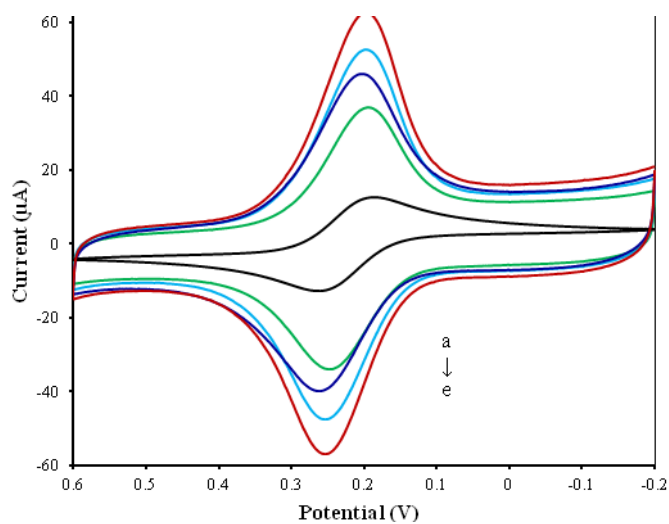

**Fig.s5** The cyclic voltammetric curve of the bare GCE (a), the modified GCEs with common graphene (b), activated graphene aerogel (c), nitrogen-doped activated graphene aerogel (d) and nitrogen-doped activated graphene aerogel/gold nanoparticles composite (e) in pH 7.0 PBS containing 1.0 mM  $[\text{Fe}(\text{CN})_6]^{3-/4-}$  with the scan rate of  $100 \text{ mV s}^{-1}$

**Table s1** The elemental composition and high resolution N1s spectra of graphen-based materials

| Samples         | Elemental composition (at%) |      |      |      | Nitrogen functional groups (BE, eV) |                             |                   |
|-----------------|-----------------------------|------|------|------|-------------------------------------|-----------------------------|-------------------|
|                 | C                           | O    | N    | Au   | Pyridinic N (398.4)                 | Amine or pyrrolic N (399.8) | Graphitic N (401) |
| G/GNs           | 93.22                       | 5.81 | -    | 0.99 | -                                   | -                           | -                 |
| AG/GNs          | 93.24                       | 5.74 | -    | 1.03 | -                                   | -                           | -                 |
| AGA/GNs         | 93.19                       | 5.85 | -    | 1.00 | -                                   | -                           | -                 |
| N-doped AGA/GNs | 87.72                       | 5.34 | 5.99 | 0.95 | 49.65                               | 28.19                       | 22.13             |
| N-doped AGA     | 87.68                       | 5.39 | 6.04 | -    | 49.45                               | 28.30                       | 22.22             |

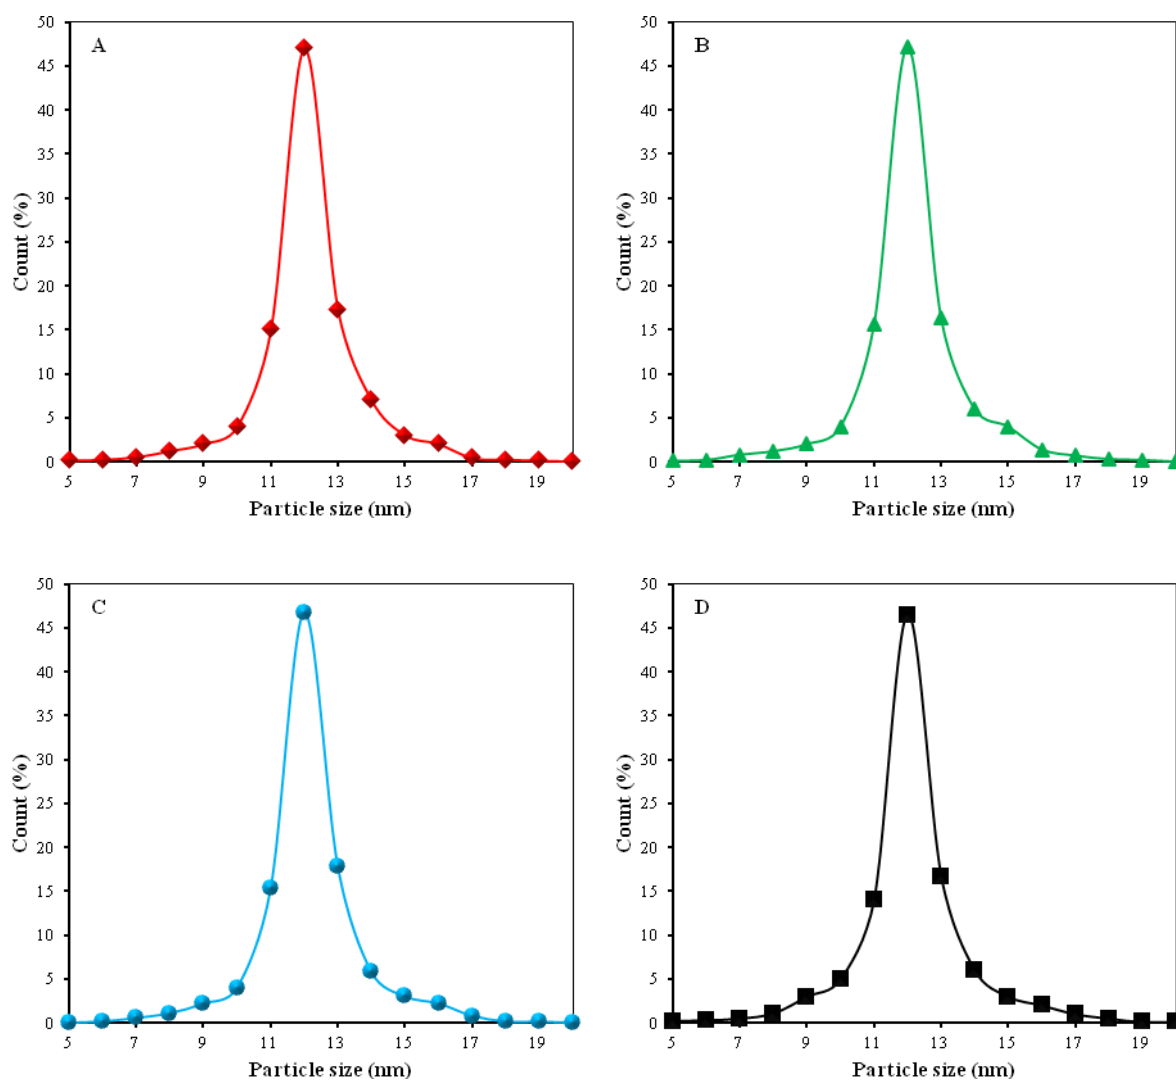

**Fig.s6** The statistical results of particle size distribution of gold nanoparticles in G/GNs (A), AG/GNs (B), AGA/GNs (C) and N-doped AGA/GNs (D)
